# Supplementary material
Source: PubMed Central journal article supplement (PMC3404300)

1 **Supplemental Figure Legends**

2 **Supplemental Figure 1:** LRH-1 and SF-1 activity in granulosa cells. Schematic representation of the (A)  
3 LRH-1 LBD and (B) SF-1 LBD GAL4 fusion constructs used in the GAL4 activation assays performed in  
4 GRMO2 cells. The data represents the mean  $\pm$  SEM of at least 4 independent experiments performed in  
5 triplicate. a indicates  $P < 0.05$  vs. GAL4 or WT NR5A LBD, b indicates  $P < 0.05$  vs. GAL4, and c  
6 indicates  $P < 0.01$  vs. GAL4 or WT NR5A LBD.

7

8 **Supplemental Figure 2:** Negative control for (A) FHL2 or (B) FHL1 immunohistochemistry.  
9 Immunohistochemistry was performed on a paraffin embedded d18 mouse ovary section using only a  
10 secondary antibody. Blocking solution was applied to the sections during the primary antibody  
11 incubation steps.

12

13 **Supplemental Figure 3:** FHL2 interacts with CREB *in vivo* and *in vitro* (A)  $\beta$ -gal assays performed with  
14 yeast cell lysates. Results are an mean  $\pm$  SEM of 3 independent experiments. (B) GST pulldown assays  
15 were performed with full length GST-FHL2. 10% of the input sample was run as a control.

**Table 1: List of PCR primers used in this study**

| <b>Gene</b>         | <b>PCR assay</b>  | <b>Primer Sequence</b>                            |
|---------------------|-------------------|---------------------------------------------------|
| RPL19               | Semi-quantitative | CTGAAGGTCAAAGGGAATGTG<br>GGACAGAGTCTTGATGATCTC    |
| FHL2                | Semi-quantitative | GGCAAGAAGTACATTCTAAAGGAGG<br>CTTGTATTCCATCTTGCGCC |
| RPL19               | qPCR              | CGGGAATCCAAGAAGATTGA<br>TTCAGCTTGTGGATGTGCTC      |
| FHL1                | qPCR              | CTGCGTGGATTGCTACAAGA<br>CCTTCATAGGCCACCACACT      |
| FHL2                | qPCR              | CAGCTATCTGGGCAACGCTT<br>CCACCAGAGACAGGGAGCACTTC   |
| Inhibin- $\alpha$   | qPCR              | GTGGGGATCCTGGAATAAGG<br>GCACCTGTAGCTGGGAAAAG      |
| ER $\beta$          | qPCR              | TGTGTGTGAAGGCCATGATT<br>TCTTCGAAATCACCCAGACC      |
| CREB                | qPCR              | CCTGCCATCACCCTGTAAC<br>TGTACCCCATCCGTACCATT       |
| P450 <sub>scc</sub> | qPCR              | CTGCCTCCAGACTTCTTTTCG<br>CTGGCTGAAGTCTCGCTTCT     |
| Inhibin- $\alpha$   | ChIP-qPCR         | CCTGAATGGGTCAGGTCACT<br>ACCCTTCTCACCCAGTCTC       |

Supplemental Figure 1:

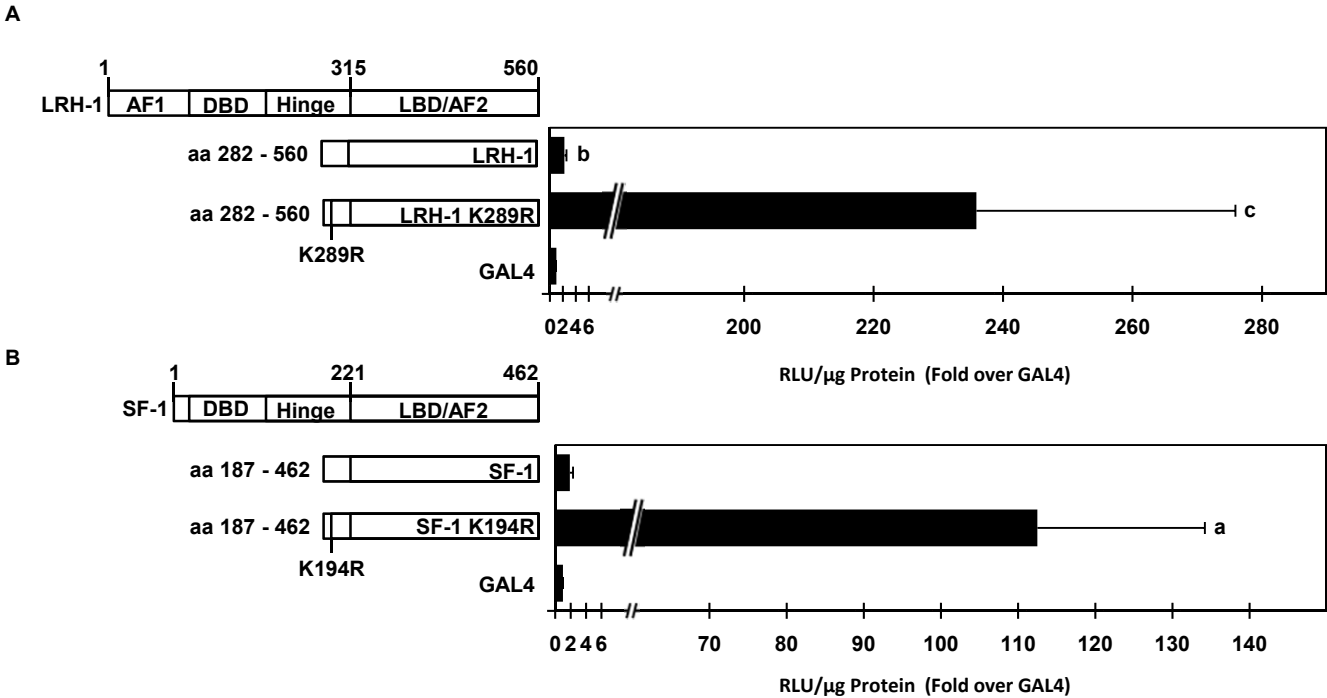

Supplemental Figure 2:

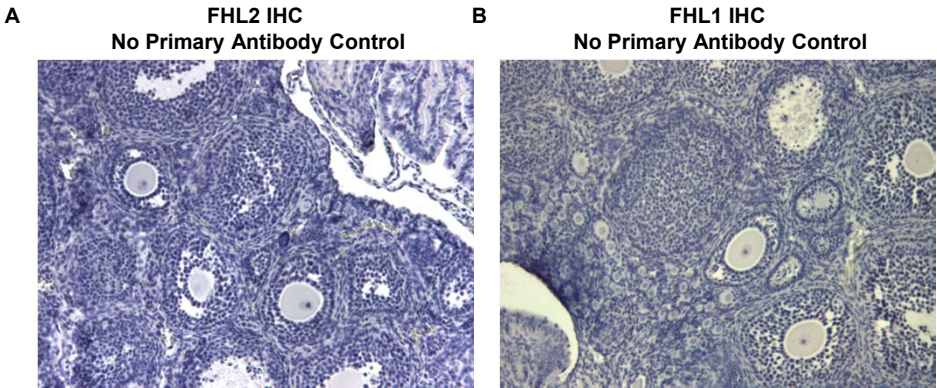

Supplemental Figure 3:

A

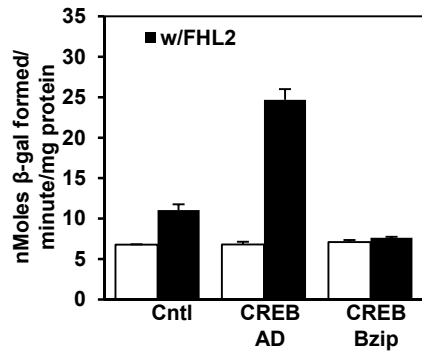

B

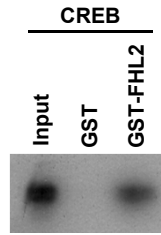

Supplement: supp_me.2011-1347v1_ME-11-1347_tabx1_figx3.pdf [file supp_me.2011-1347v1_ME-11-1347_tabx1_figx3.pdf]
